# Supplementary material
Source: PubMed Central journal article supplement (PMC1804291)
Supplement: NIHMS17966-supplement-Supplemental_d.pdf [file NIHMS17966-supplement-Supplemental_d.pdf]

Cell, Volume 127

## **Supplemental Data**

### **Structural Basis for the Methylation**

#### **State-Specific Recognition of Histone**

#### **H4-K20 by 53BP1 and Crb2 in DNA Repair**

**Maria Victoria Botuyan, Joseph Lee, Irene M. Ward, Ja-Eun Kim, James R. Thompson, Junjie Chen, and Georges Mer**

## **Supplemental Experimental Procedures**

### **Preparation of Proteins and Peptides**

All histone H3-K79 and H4-K20 peptides with different lysine methylation states as well as dimethylated H3-K9 and H3-K27 were synthesized by N-9-fluorenyl methylcarbonyl chemistry and purified by reversed phase HPLC (purity > 98%) at the Mayo Clinic peptide synthesis facility. Correct peptide masses were verified by mass spectrometry.

53BP1, JMJD2A and Crb2 constructs encompassing amino acids 1484-1603, 897-1011 and 358-507, respectively, were cloned into a modified pET15b vector (Novagen, Madison, WI) encoding an N-terminal His<sub>6</sub>-tag and a TEV protease cleavage site. 53BP1 point mutants were generated with QuickChange (Stratagene, La Jolla, Ca).

Nonlabeled 53BP1 was prepared for ITC experiments and crystal trials while uniformly <sup>15</sup>N- and <sup>15</sup>N/<sup>13</sup>C-labeled proteins were used for NMR spectroscopy. Both non- and selenomethionine-labeled Crb2 were produced to grow crystals and an <sup>15</sup>N-labeled Crb2 sample was prepared for NMR titration. JMJD2A was produced nonlabeled.

In a typical nonlabeled protein production the plasmid was transformed in *E. coli* BL21(DE3) cells that were grown in Luria-Bertani (LB) broth at 37°C to an *A*<sub>600</sub> of ~0.8,

transferred to an 18°C shaker incubator and after 1 hr induced by the addition of 1 mM isopropyl  $\beta$ -D-thiogalactoside. The cells were harvested 16 h later by centrifugation at 4000g for 15 mins. Pelleted cells were resuspended in 50 mM sodium phosphate buffer, pH 7.5 and 300 mM NaCl (bind buffer) with 5 mM imidazole, lysed with a high-pressure microfluidizer Emulsiflex C-5 (Avestin Inc., Ottawa, Canada) and centrifuged at 20000g for 30 mins. The supernatant was then passed through a Ni<sup>2+</sup>-loaded NTA column (Qiagen, Valencia, CA) and the protein eluted with 500 mM imidazole in bind buffer after washing the column with 20mM imidazole in bind buffer. The His<sub>6</sub>-tag was cleaved by overnight incubation with TEV protease at room temperature. The protein was further purified by size exclusion chromatography using a preparative Superdex 75 column (GE Healthcare, Piscataway, NJ) and concentrated using 3 kDa centricon (Millipore, Billerica, MA) centrifugal filter units.

The procedure for preparing <sup>15</sup>N- and <sup>15</sup>N/<sup>13</sup>C-labeled proteins was similar as above except that M9 media with <sup>15</sup>NH<sub>4</sub>Cl and <sup>13</sup>C<sub>6</sub>-glucose, supplemented with 0.1% w/v or 10% v/v of isotopically enriched ISOGRO (Isotec, St. Louis, MO) or Silantes OD2 (CIL, Andover, MA), respectively, replaced the LB media. For the production of selenomethionine-labeled Crb2 protein, auxotrophic *E. coli* B834(DE3) cells (Novagen, Madison, WI) and M9 media containing selenomethionine, nucleosides and all 20 amino acids except methionine were used (Botuyan et al., 2004).

## **X-Ray Crystallography**

X-ray diffraction data for 53BP1 and Crb2 were collected at the X12-C beamline, Brookhaven National Laboratory (BNL), NY and 19-ID beamline (SBC-CAT) in the Advanced Photon Source (APS), Argonne National Laboratory, IL, respectively.

Crystals of free 53BP1 tandem tudor domains were grown at 22°C by vapor diffusion of hanging drops by mixing 1  $\mu$ L of ~3 mM protein in 50 mM Tris/HCl, pH 7.0, 100 mM NaCl with 1  $\mu$ L of reservoir solution (solution 1) containing 100 mM HEPES/Na, pH 7.0, 2% PEG 400 and 2 M ammonium sulfate. Crystals grew in 1 to 3 weeks. The space group of the crystals is C2 with one molecule per asymmetric unit. The structure of the 53BP1/H4-K20me2 complex was obtained by soaking crystals of the free protein for 1 to 6 days in solution 1 containing the peptide (residues 16-25) at concentrations ranging from 5 to 10 mM. Crystals were transferred into a cryoprotectant solution consisting of 30% glucose in solution 1, and were quick-frozen in a cryoloop (Hampton Research, Aliso Viejo, CA) with liquid nitrogen.

Crystallization and cryoprotection of Crb2 follow the same protocol except that solution 1 was changed to 0.1 M HEPES/Na, pH 7.5, 0.8 M NaH<sub>2</sub>PO<sub>4</sub> and 0.8 M KH<sub>2</sub>PO<sub>4</sub>. The trigonal crystals have a space group of P3<sub>2</sub>21, with three molecules of Crb2 in each asymmetric unit.

## **shRNA-Mediated Stable Inhibition of Dot1 Expression in HeLa and A549 Cell Lines**

A plasmid encoding a short hairpin RNA (shRNA) targeting the *Dot1* gene was prepared as previously described (Trushin, et al., 2003). Complementary oligonucleotides were designed as follows: each oligonucleotide contains a 5'-BglII and 3'-HindIII restriction

sites, an RNA polymerase III start and termination sequence, and 19 nucleotides of *Dot1* specific sequence separated by a 9-nucleotide loop. The sense strand is 5'-GATCCCCGCACCTCTGAACTTCAGAATCAAGAGATTCTGAAGTTCAGAGGTGTTTTGGAAA-3' and the anti-sense strand is 5'-AGCTTTTCCAAAAGCACCTCTGAACTTCAGAATCTCTTGAATTCTGAAGTTCAGAGGTGCGGG-3'. The oligonucleotides were purchased from Dharmacon, Lafayette, CO.

Because there is no antibody available to detect endogenous Dot1, the efficiency of shRNA against Dot1 was tested by co-transfecting the cells with a vector encoding Flag-tagged full length Dot1 (Feng et al., 2002) and detecting Dot1 by western blot using a Flag-directed antibody. HeLa and A549 stable cell lines knocking down Dot1 expression were generated.

The pFRT-H1P plasmid for RNA targeting and Flag-Dot1 construct were kindly provided by Dr. D. Billadeau and Dr. Y. Zhang, respectively.

### **Downregulation of Histone H4 Methylation at Lysine 20**

HeLa cells were transfected with 3 rounds of control siRNA (5'-UUCAAUAAAUUCUUGAGGUdTdT-3') or various siRNA directed against PR-Set7 (Smartpool, #1 (5'-ACCCGUGGCUGAAGCAUUAUdTdT-3'), #2 (5'-GCAACUAGAGAGACAAAUCUdTdT-3')). The oligonucleotides were purchased from Dharmacon, Lafayette, CO. 96 h after the first transfection, the cells were analyzed by immunofluorescent staining and immunoblotting.

## **Immunofluorescence and Western Blotting**

After exposure to ionizing radiations, the cells were treated with paraformaldehyde for fixation using a standard protocol. In the case of phosphorylated-ATM staining, a 4 min detergent extraction step preceded fixation. The following antibodies were used for immunostaining: rabbit anti-53BP1 E6 (Rappold et al., 2001), rabbit anti-phosphorylated-H2AX (Ser139) (Ward and Chen, 2001), mouse anti-phosphorylated-ATM kinase (Ser1981) (Rockland, Gilbertsville, PA), rabbit anti-Dot1 (raised against a mix of N-terminal and C-terminal Dot1 peptides). For immunoblotting, cells were lysed in NETN buffer (150 mM NaCl, 1 mM EDTA, 50 mM Tris/HCl, pH 8.0, 0.1% NP-40) prior to histone extraction in a buffer containing 10 mM HEPES, 1.5 mM MgCl<sub>2</sub>, 10 mM KCl, 0.5 mM DTT, 1.5 mM Pefabloc and 0.2 M HCl. Extracted histones were neutralized by adding one-fifth volume of 1.5 M Tris/HCl, pH 8.8. The NETN fraction was used for PR-Set7 Western blotting.

## **Supplemental References**

Botuyan, M. V., Nominé, Y., Yu, X., Juranic, N., Macura, S., Chen, J., and Mer, G. (2004). Structural basis of BACH1 phosphopeptide recognition by BRCA1 tandem BRCT domains. *Structure* 12, 1137-1146.

Feng, Q., Wang, H., Ng, H.H., Erdjument-Bromage, H., Tempst, P., Struhl, K. and Zhang, Y. (2002). Methylation of H3-lysine 79 is mediated by a new family of HMTases without a SET domain. *Curr. Biol.* 12, 1052-1058.

Rappold, I., Iwabuchi, K., Date, T., and Chen, J. (2001). Tumor suppressor p53 binding protein 1 (53BP1) is involved in DNA damage-signaling pathways. *J. Cell Biol.* *153*, 613-620.

Trushin, S.A., Pennington, K.N., Carmona, E.M., Asin, S., Savoy, D.N., Billadeau, D.D. and Paya, C.V. (2003). Protein kinase C $\alpha$  (PKC  $\alpha$ ) acts upstream of PKC  $\theta$  to activate I $\kappa$ B kinase and NF- $\kappa$ B in T lymphocytes. *Mol. Cell. Biol.* *23*, 7068-7081.

Ward, I. M., and Chen, J. (2001). Histone H2AX is phosphorylated in an ATR-dependent manner in response to replicational stress. *J. Biol. Chem.* *276*, 47759-47762.

**Table S1. X-Ray Data Collection and Refinement Statistics**

| <b>Data Collection</b>                               |                           |                           |
|------------------------------------------------------|---------------------------|---------------------------|
| Space Group                                          | 53BP1 Free<br>C2          | 53BP1 + H4-K20me2<br>C2   |
| Cell Dimensions                                      |                           |                           |
| <i>a</i> , <i>b</i> , <i>c</i> (Å)                   | 55.90, 77.83, 36.35       | 56.37, 78.54, 36.45       |
| $\alpha$ , $\beta$ , $\gamma$ (°)                    | 90.00, 121.13, 90.00      | 90.00, 121.20, 90.00      |
| Resolution (Å)                                       | 50 – 1.25 (1.29 – 1.25)   | 50 – 1.70 (1.76 – 1.70)   |
| <i>R</i> <sub>sym</sub> or <i>R</i> <sub>merge</sub> | 0.029 (0.293)             | 0.084 (0.223)             |
| Completeness (%)                                     | 93.2 (61.9)               | 82.8 (32.2)               |
| Redundancy                                           | 7.0 (4.8)                 | 6.4 (3.4)                 |
| <b>Refinement</b>                                    |                           |                           |
| Resolution (Å)                                       | 50 – 1.25                 | 50 – 1.70                 |
| Number of Reflections                                | 32860                     | 11776                     |
| <i>R</i> <sub>work</sub> / <i>R</i> <sub>free</sub>  | 0.194(0.369)/0.241(0.336) | 0.176(0.197)/0.251(0.212) |
| Number of Atoms                                      | 1396                      | 1316                      |
| Protein                                              | 1184                      | 1098                      |
| Ligand/ion                                           | 5                         | 28                        |
| Water                                                | 207                       | 180                       |
| <i>B</i> -factors                                    | 19.9                      | 33.5                      |
| Protein                                              | 17.7                      | 30.8                      |
| Ligand/ion                                           | 26.6                      | 56.5/96.3                 |
| Water                                                | 32.6                      | 44.4                      |
| R.m.s. deviations                                    |                           |                           |
| Bond lengths (Å)                                     | 0.015                     | 0.024                     |
| Bond angles (°)                                      | 1.736                     | 2.223                     |
| Ramachandran Plot Statistics                         |                           |                           |
| Most Favorable Regions                               | 93.1%                     | 91.2%                     |
| Additional Allowed Regions                           | 5.9%                      | 8.8%                      |
| Generously Allowed Regions                           | 1.0%                      | 0.0%                      |
| Disallowed Regions                                   | 0.0%                      | 0.0%                      |

The highest resolution shell is shown in parentheses.

**Table S2. X-Ray Data Collection and Refinement Statistics**

| <b>Data Collection (SAD)</b>           | <i>Peak</i>                 |
|----------------------------------------|-----------------------------|
|                                        | Crb2 (SeMet)                |
| Space Group                            | P3 <sub>2</sub> 21          |
| Cell Dimensions                        |                             |
| <i>a</i> , <i>b</i> , <i>c</i> (Å)     | 116.92, 116.92, 87.02       |
| $\alpha$ , $\beta$ , $\gamma$ (°)      | 90.00, 90.00, 120.00        |
| Wavelength                             | 0.97956                     |
| Resolution (Å)                         | 50 – 2.40 (2.49 – 2.40)     |
| $R_{\text{sym}}$ or $R_{\text{merge}}$ | 0.111 (0.499)               |
| $I/\sigma I$                           | 46.8 (7.4)                  |
| Completeness (%)                       | 99.9 (100)                  |
| Redundancy                             | 13.8 (14.3)                 |
| <b>Refinement</b>                      |                             |
| Resolution (Å)                         | 50 – 2.40                   |
| Number of Reflections                  | 25798                       |
| $R_{\text{work}} / R_{\text{free}}$    | 0.192 (0.214)/0.256 (0.316) |
| Number of Atoms                        | 3718                        |
| Protein                                | 3496                        |
| Ligand/ion                             | 55                          |
| Water                                  | 167                         |
| <i>B</i> -factors                      |                             |
| Protein                                | 32.2                        |
| Ligand/ion                             | 82.8                        |
| Water                                  | 39.8                        |
| R.m.s. deviations                      |                             |
| Bond lengths (Å)                       | 0.029                       |
| Bond angles (°)                        | 2.619                       |
| Ramachandran Plot Statistics           |                             |
| Most Favorable Regions                 | 83.9%                       |
| Additional Allowed Regions             | 14.1%                       |
| Generously Allowed Regions             | 1.9%                        |
| Disallowed Regions                     | 0.0%                        |

The highest resolution shell is shown in parentheses.



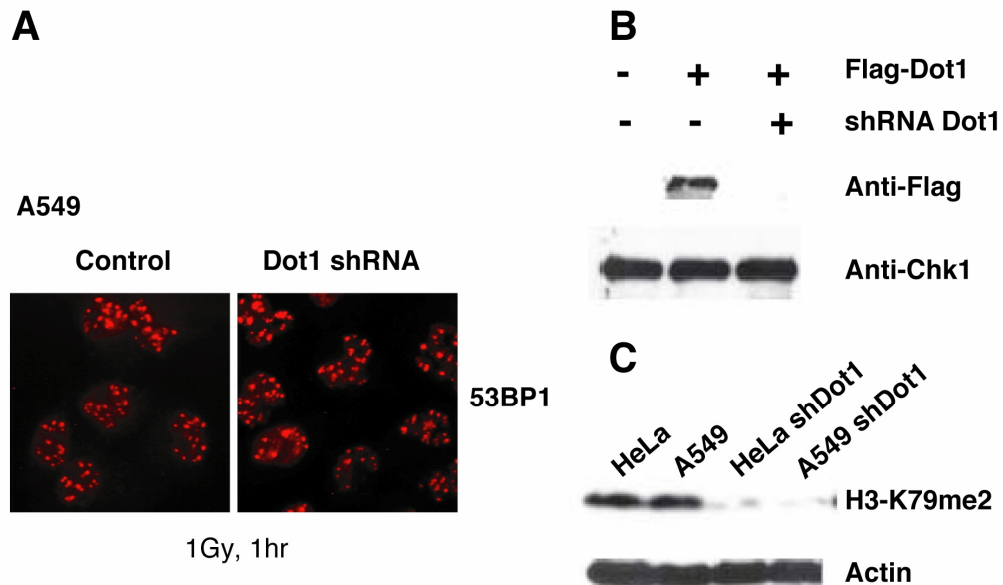

**Figure S1. shRNA-Mediated Knockdown of Dot1**

(A) A549 and HeLa stable shRNA Dot1 knockout cell lines were immuno-analyzed for 53BP1 localization (53BP1) in response to 1 Gy of ionizing radiation. The results for A549 cells are shown.

(B) The efficiency of shRNA against Dot1 (shRNA Dot1) was tested by co-transfection with Flag-tagged full length Dot1 (Flag-Dot1) and a western blot against the Flag tag (Anti-Flag) because there is no antibody available to detect endogenous Dot1.

(C) Aliquot of the shRNA-treated stable A549 (A549 shDot1) and HeLa cell lines (HeLa shDot1) were examined for dimethylated histone H3-K79 (H3-K79me2) levels by immunoblotting.

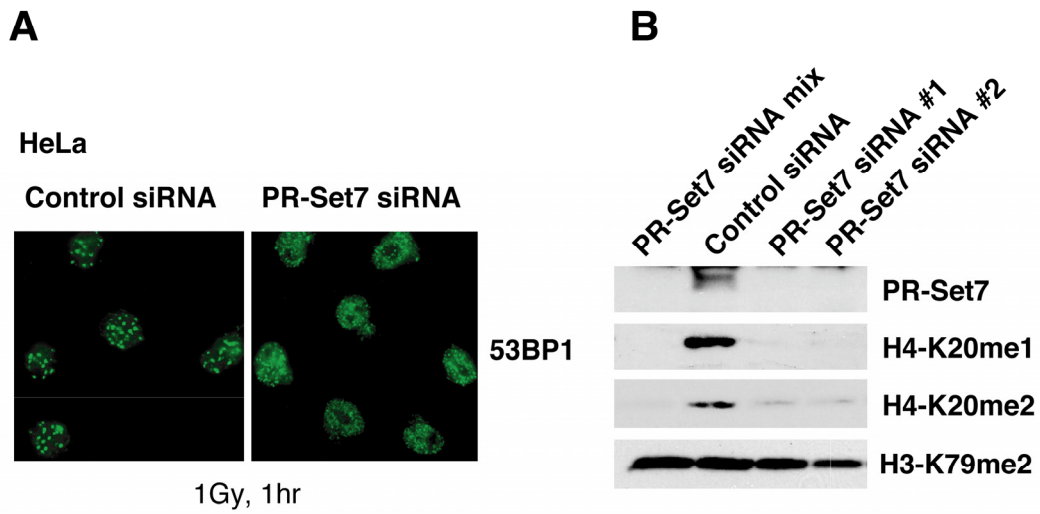

**Figure S2. siRNA-Mediated Knockdown of PR-Set7/Set8**

(A) HeLa cells, treated 3 consecutive times with control (Control siRNA) or PR-Set7-specific siRNA (PR-Set7 siRNA), were immuno-analyzed for 53BP1 localization (53BP1) in response to 1 Gy of ionizing radiation.

(B) An aliquot of the siRNA-treated cells was collected and examined for PR-Set7 (PR-Set7) as well as monomethylated and dimethylated histone H4-K20 levels (H4-K20me1 and H4-K20me2) by immunoblotting. Expression levels of dimethylated histone H3-K79 (H3-K79me2) were used as loading control.

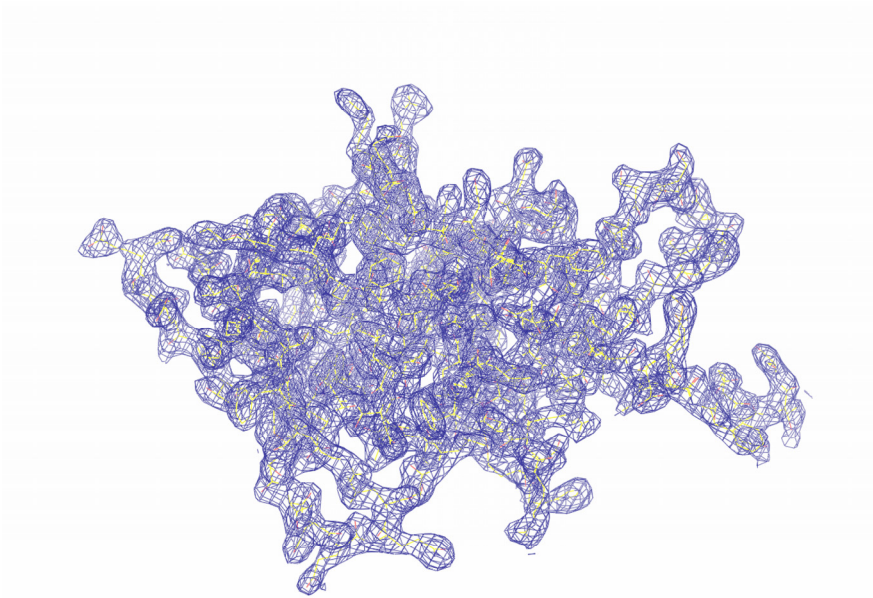

**Figure S3. Sample of Crb2 Tandem Tudor Domains Electron Density Map**

The electron density map of one of the three Crb2 molecules in the asymmetric unit is shown.
